# Supplementary figures and images for: A Comprehensive Analysis Revealing FBXW9 as a Potential Prognostic and Immunological Biomarker in Breast Cancer
Source: MDPI journal article supplement (doi:10.3390/ijms24065262), 2023-03-09

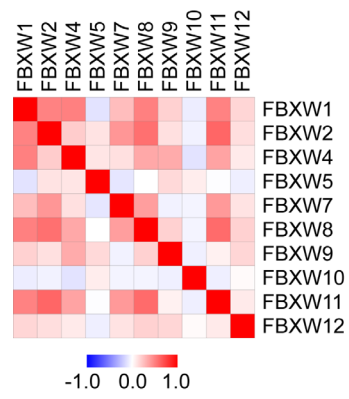

**Figure S1.** The correlations between members of FBXW were analyzed in cancers.

Supplement: s1 [file s1]
